# Supplementary material for: Crystal structure and elastic properties of parabreyite: a new high-pressure ring silicate in the CaSiO3 system
Source: Copernicus journal article supplement (doi:10.5194/ejm-37-13-2025), 2025-01-08
Supplement: Supplementary file 1 [file ejm-37-13-2025-supplement.pdf]

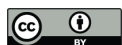

*Supplement of*

## **Crystal structure and elastic properties of parabreyite: a new high-pressure ring silicate in the $\text{CaSiO}_3$ system**

**Benedetta Chrappan Soldavini et al.**

*Correspondence to:* Benedetta Chrappan Soldavini ([benedetta.chrappan@unimi.it](mailto:benedetta.chrappan@unimi.it))

The copyright of individual parts of the supplement might differ from the article licence.

1 **Supplementary materials:**

2 **Figure S1:** HAADF STEM images of the two crystals from which we collected the 3D ED data merged for solving  
3 the crystal structure. The size and the location of the electron beam on the crystals is indicated by red circles.  
4 The crystal on the left shows how the crystal grain is formed by thin superimposed sheets. The relative shift  
5 between these sheets is the probable cause of the disorder. The direction of view is very close to  $b^*$ .

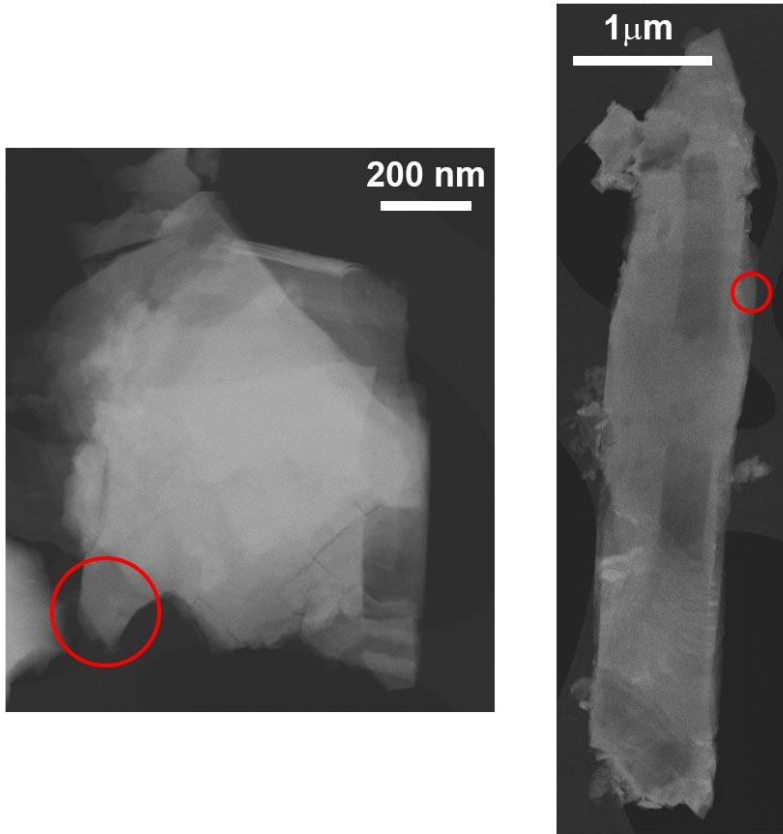

6  
7 **Figure S2:** single crystal of parabayite in quartz capillary for the low-to-high temperature experiment.

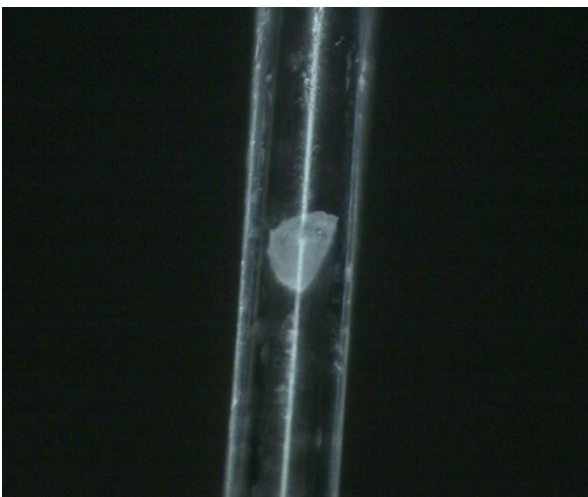

8  
9  
10 **Figure S3:** Eulerian finite strain ( $f_e$ ) vs. normalized stress ( $F_e$ ) plot for the different high-pressure runs.

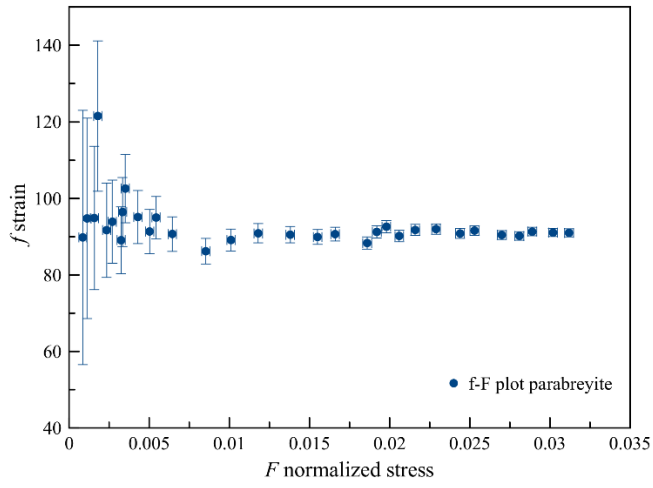

11

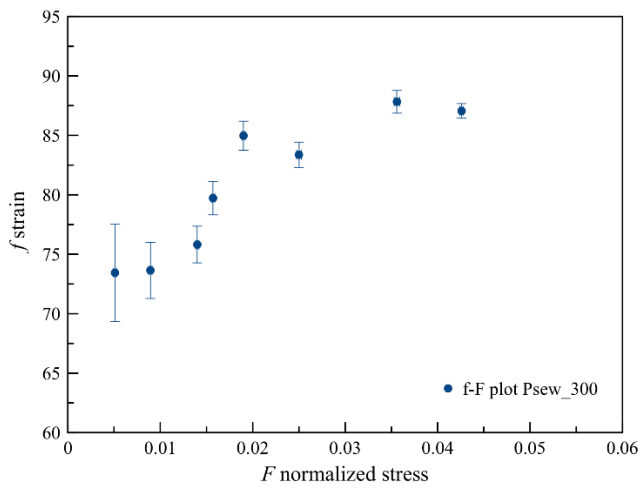

12

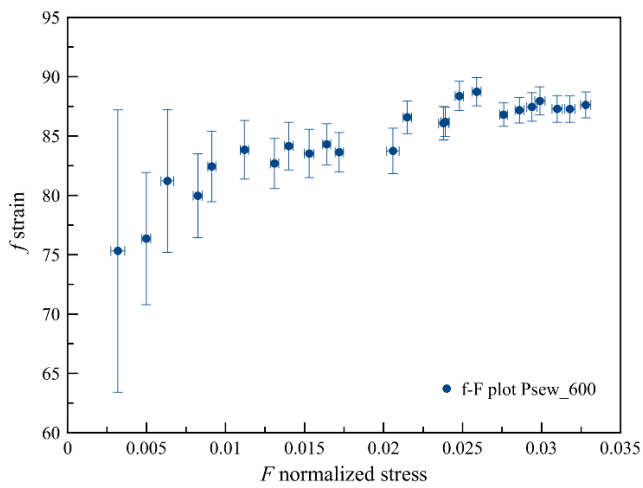

13

14

15

16

17

18 **Table S1:** Details of 3D ED data collection and kinematical refinement.

|                                                        |                                |
|--------------------------------------------------------|--------------------------------|
| <b>Experimental details<br/>(Crystal Data)</b>         |                                |
| Crystal system, space group                            | Triclinic, <i>P-1</i>          |
| Temperature (K)                                        | 293                            |
| <i>a, b, c</i> (Å)                                     | 8.2(1), 9.3(1), 10.5(1)        |
| $\alpha, \beta, \gamma$ (°)                            | 74(1), 90(1), 77(1)            |
| Radiation type                                         | Electron, $\lambda = 0.0335$ Å |
| 3D ED data collection                                  | PEDT                           |
| Precession semiangle                                   | 1°                             |
| Tilt range of the two merged data sets (°)             | 101; 105                       |
| Data resolution (Å)                                    | 0.7                            |
|                                                        | <b>Kinematical Refinement</b>  |
| No. of: measured, independent and observed reflections | 5217, 2864, 2013               |
| $R_{\text{int}}$ (all)                                 | 12.2%                          |
| Coverage up to 0.7Å                                    | 63%                            |
| Parameters                                             | 121                            |
| $R_{\text{obs}}, wR_{\text{obs}}$ (%), <i>S</i>        | 37.8, 68.04, 4.79              |
| $R_{\text{all}}, wR_{\text{all}}$ (%)                  | 42.0, 72.8                     |

19

20 **Table S2:** Parabreyite compressibility

| <i>Step</i> | <i>P</i> (GPa) | <i>a</i> (Å) | <i>b</i> (Å) | <i>c</i> (Å) | $\alpha$ (°) | $\beta$ (°) | $\gamma$ (°) | <i>v</i> (Å <sup>3</sup> ) |
|-------------|----------------|--------------|--------------|--------------|--------------|-------------|--------------|----------------------------|
| 0           | 0.0001         | 8.1713(2)    | 9.3318(2)    | 10.4382(2)   | 73.902(2)    | 89.8888(19) | 77.489(2)    | 745.14(3)                  |
| 1           | 0.23(5)        | 8.161(2)     | 9.369(5)     | 10.419(3)    | 73.80(4)     | 90.13(2)    | 77.31(4)     | 744.6(4)                   |
| 2           | 0.32(5)        | 8.157(2)     | 9.367(5)     | 10.415(3)    | 73.83(4)     | 90.14(2)    | 77.33(4)     | 744.0(4)                   |
| 3           | 0.45(5)        | 8.152(2)     | 9.367(5)     | 10.408(2)    | 73.84(4)     | 90.17(2)    | 77.30(4)     | 743.0(4)                   |
| 4           | 0.65(5)        | 8.149(2)     | 9.355(5)     | 10.400(2)    | 73.84(4)     | 90.13(2)    | 77.35(4)     | 741.3(4)                   |
| 5           | 0.77(5)        | 8.146(2)     | 9.355(5)     | 10.393(2)    | 73.84(4)     | 90.14(2)    | 77.35(4)     | 740.5(4)                   |
| 6           | 0.98(5)        | 8.142(2)     | 9.353(5)     | 10.382(3)    | 73.83(4)     | 90.14(2)    | 77.33(4)     | 739.1(4)                   |
| 7           | 1.25(5)        | 8.136(2)     | 9.343(5)     | 10.368(2)    | 73.84(4)     | 90.13(2)    | 77.36(4)     | 737.0(4)                   |
| 8           | 1.41(5)        | 8.131(3)     | 9.330(5)     | 10.362(3)    | 73.87(4)     | 90.13(2)    | 77.42(5)     | 735.4(4)                   |
| 9           | 1.59(5)        | 8.131(2)     | 9.329(5)     | 10.356(2)    | 73.84(4)     | 90.09(2)    | 77.35(4)     | 734.5(4)                   |
| 10          | 1.81(5)        | 8.123(2)     | 9.321(5)     | 10.341(2)    | 73.83(4)     | 90.10(2)    | 77.43(4)     | 732.3(4)                   |
| 11          | 2.30(5)        | 8.102(2)     | 9.308(4)     | 10.312(2)    | 73.90(3)     | 90.21(2)    | 77.51(3)     | 727.8(4)                   |
| 12          | 2.83(5)        | 8.096(2)     | 9.295(5)     | 10.288(2)    | 73.89(4)     | 90.16(2)    | 77.49(4)     | 724.5(4)                   |
| 13          | 3.40(5)        | 8.085(2)     | 9.273(5)     | 10.266(2)    | 73.95(4)     | 90.12(2)    | 77.61(4)     | 720.9(4)                   |
| 14          | 4.00(5)        | 8.072(2)     | 9.259(5)     | 10.238(2)    | 73.92(4)     | 90.12(2)    | 77.64(4)     | 716.7(4)                   |
| 15          | 4.51(5)        | 8.056(2)     | 9.248(5)     | 10.213(2)    | 73.97(4)     | 90.18(2)    | 77.74(4)     | 713.1(4)                   |
| 16          | 4.90(5)        | 8.055(3)     | 9.225(5)     | 10.204(2)    | 73.99(4)     | 90.11(2)    | 77.80(4)     | 710.8(4)                   |
| 17          | 5.40(5)        | 8.036(3)     | 9.213(5)     | 10.177(2)    | 74.00(4)     | 90.20(2)    | 77.89(4)     | 706.7(4)                   |

|    |         |          |          |           |          |          |          |          |
|----|---------|----------|----------|-----------|----------|----------|----------|----------|
| 18 | 5.77(5) | 8.038(3) | 9.201(5) | 10.165(2) | 74.01(4) | 90.12(2) | 77.98(4) | 705.5(4) |
| 19 | 6.17(5) | 8.028(3) | 9.185(5) | 10.151(2) | 74.01(4) | 90.11(2) | 78.06(4) | 702.6(4) |
| 20 | 6.61(5) | 8.025(3) | 9.174(5) | 10.134(2) | 74.03(3) | 90.09(2) | 78.14(4) | 700.6(4) |
| 21 | 7.05(5) | 8.019(3) | 9.153(5) | 10.122(2) | 74.04(4) | 90.04(2) | 78.26(4) | 698.1(4) |
| 22 | 7.49(5) | 8.010(3) | 9.135(5) | 10.104(2) | 74.03(4) | 90.05(2) | 78.38(4) | 695.0(4) |
| 23 | 7.85(5) | 8.003(3) | 9.129(5) | 10.090(2) | 74.05(4) | 90.04(2) | 78.47(4) | 693.3(4) |
| 24 | 8.35(5) | 7.991(3) | 9.117(5) | 10.067(2) | 74.05(4) | 90.08(2) | 78.53(4) | 689.9(4) |
| 25 | 8.72(5) | 7.985(3) | 9.105(5) | 10.054(2) | 74.04(4) | 90.08(2) | 78.61(4) | 687.7(4) |
| 26 | 9.12(5) | 7.977(3) | 9.102(5) | 10.039(2) | 74.07(4) | 90.09(2) | 78.67(4) | 686.1(4) |
| 27 | 9.54(5) | 7.971(3) | 9.087(5) | 10.024(2) | 74.07(4) | 90.07(2) | 78.78(4) | 683.7(4) |
| 28 | 9.89(5) | 7.967(3) | 9.077(5) | 10.013(2) | 74.06(4) | 90.06(2) | 78.80(4) | 681.8(4) |
| 29 | 6.07(5) | 8.032(2) | 9.206(5) | 10.153(2) | 73.99(4) | 90.17(2) | 77.92(4) | 704.2(4) |
| 30 | 0.66(5) | 8.156(2) | 9.357(5) | 10.405(2) | 73.84(4) | 90.08(2) | 77.35(4) | 742.5(4) |

21

22 **Table S3:** Pseudowollastonite compressibility

| 300 $\mu$ m DAC |                |              |              |              |              |             |              |                          |
|-----------------|----------------|--------------|--------------|--------------|--------------|-------------|--------------|--------------------------|
| <i>Step</i>     | <i>P (GPa)</i> | <i>a (Å)</i> | <i>b (Å)</i> | <i>c (Å)</i> | $\alpha$ (°) | $\beta$ (°) | $\gamma$ (°) | <i>V (Å<sup>3</sup>)</i> |
| 0               | 0.0001         | 11.8166(8)   | 6.8456(3)    | 10.5177(7)   | 90           | 111.287(7)  | 90           | 792.75(8)                |
| 1               | 1.15(5)        | 11.734(3)    | 6.803(3)     | 10.494(2)    | 90           | 111.23(3)   | 90           | 780.8(4)                 |
| 2               | 2.06(5)        | 11.678(3)    | 6.772(2)     | 10.469(2)    | 90           | 111.17(2)   | 90           | 772.0(4)                 |
| 3               | 3.41(5)        | 11.613(3)    | 6.729(3)     | 10.435(2)    | 90           | 111.11(3)   | 90           | 760.6(4)                 |
| 4               | 4.06(5)        | 11.585(3)    | 6.710(2)     | 10.438(2)    | 90           | 111.12(3)   | 90           | 756.8(4)                 |
| 5               | 5.32(5)        | 11.537(2)    | 6.686(3)     | 10.414(2)    | 90           | 111.06(2)   | 90           | 749.6(4)                 |
| 6               | 7.05(5)        | 11.459(3)    | 6.637(4)     | 10.382(2)    | 90           | 111.04(3)   | 90           | 736.9(5)                 |
| 7               | 11.13(5)       | 11.313(3)    | 6.540(4)     | 10.343(3)    | 90           | 110.86(3)   | 90           | 715.1(6)                 |
| 8               | 13.64(5)       | 11.222(3)    | 6.493(3)     | 10.295(2)    | 90           | 110.79(3)   | 90           | 701.3(4)                 |
| 600 $\mu$ m DAC |                |              |              |              |              |             |              |                          |
| <i>Step</i>     | <i>P (GPa)</i> | <i>a (Å)</i> | <i>b (Å)</i> | <i>c (Å)</i> | $\alpha$ (°) | $\beta$ (°) | $\gamma$ (°) | <i>V (Å<sup>3</sup>)</i> |
| 0               | 0.0001         | 11.813(4)    | 6.8461(8)    | 10.5161(15)  | 90           | 111.26(3)   | 90           | 792.5(3)                 |
| 1               | 0.73(5)        | 11.74(2)     | 6.8263(12)   | 10.517(5)    | 90           | 111.34(12)  | 90           | 785(1)                   |
| 2               | 1.17(5)        | 11.752(8)    | 6.8009(8)    | 10.485(3)    | 90           | 111.29(5)   | 90           | 780.8(6)                 |
| 3               | 1.59(5)        | 11.696(14)   | 6.7992(8)    | 10.493(3)    | 90           | 111.25(8)   | 90           | 777.7(9)                 |
| 4               | 2.06(5)        | 11.702(8)    | 6.7736(7)    | 10.469(3)    | 90           | 111.27(6)   | 90           | 773.3(6)                 |
| 5               | 2.36(5)        | 11.694(7)    | 6.7632(8)    | 10.469(3)    | 90           | 111.32(5)   | 90           | 771.3(5)                 |
| 6               | 2.99(5)        | 11.668(7)    | 6.7427(7)    | 10.458(3)    | 90           | 111.31(0)   | 90           | 766.5(5)                 |
| 7               | 3.46(5)        | 11.641(7)    | 6.7291(6)    | 10.445(3)    | 90           | 111.28(0)   | 90           | 762.4(5)                 |
| 8               | 3.78(5)        | 11.620(7)    | 6.7239(7)    | 10.440(3)    | 90           | 111.21(0)   | 90           | 760.4(5)                 |
| 9               | 4.13(5)        | 11.609(8)    | 6.7108(7)    | 10.432(3)    | 90           | 111.24(50)  | 90           | 757.5(6)                 |
| 10              | 4.49(5)        | 11.575(7)    | 6.7078(7)    | 10.424(3)    | 90           | 111.09(50)  | 90           | 755.1(5)                 |
| 11              | 4.71(5)        | 11.572(8)    | 6.6973(7)    | 10.424(3)    | 90           | 111.18(50)  | 90           | 753.2(5)                 |
| 12              | 5.73(5)        | 11.486(12)   | 6.6807(7)    | 10.419(4)    | 90           | 111.09(80)  | 90           | 745.9(8)                 |
| 13              | 6.22(5)        | 11.521(6)    | 6.6553(7)    | 10.407(3)    | 90           | 111.21(5)   | 90           | 743.9(5)                 |
| 14              | 6.89(5)        | 11.484(8)    | 6.6427(8)    | 10.385(3)    | 90           | 111.09(6)   | 90           | 739.2(6)                 |
| 15              | 6.93(5)        | 11.486(8)    | 6.6404(6)    | 10.386(3)    | 90           | 111.10(6)   | 90           | 739.0(5)                 |

|    |         |           |           |           |    |           |    |          |
|----|---------|-----------|-----------|-----------|----|-----------|----|----------|
| 16 | 7.42(5) | 11.464(7) | 6.6335(7) | 10.385(3) | 90 | 111.06(0) | 90 | 737.0(5) |
| 17 | 7.82(5) | 11.464(8) | 6.6197(6) | 10.378(3) | 90 | 111.12(5) | 90 | 734.7(5) |
| 18 | 8.21(5) | 11.423(6) | 6.6133(6) | 10.368(2) | 90 | 111.00(5) | 90 | 731.2(4) |
| 19 | 8.59(5) | 11.413(7) | 6.6041(8) | 10.365(3) | 90 | 111.04(4) | 90 | 729.1(5) |
| 20 | 8.90(5) | 11.409(8) | 6.5930(8) | 10.364(4) | 90 | 111.09(5) | 90 | 727.4(6) |
| 21 | 9.12(5) | 11.395(8) | 6.5934(8) | 10.357(3) | 90 | 111.02(6) | 90 | 726.4(6) |
| 22 | 9.44(5) | 11.367(9) | 6.5897(8) | 10.351(3) | 90 | 110.94(6) | 90 | 724.1(6) |
| 23 | 9.73(5) | 11.374(8) | 6.5762(7) | 10.344(3) | 90 | 110.98(6) | 90 | 722.4(6) |
| 24 | 10.1(5) | 11.352(8) | 6.5694(8) | 10.345(4) | 90 | 110.96(6) | 90 | 720.5(6) |

23

24 **Table S4:** Parabreyite thermal expansion

| <i>Step</i> | <i>T</i> (K) | <i>a</i> (Å) | <i>b</i> (Å) | <i>c</i> (Å) | $\alpha$ (°) | $\beta$ (°) | $\gamma$ (°) | <i>V</i> (Å <sup>3</sup> ) |
|-------------|--------------|--------------|--------------|--------------|--------------|-------------|--------------|----------------------------|
| 1           | 100          | 8.1860(2)    | 9.3471(3)    | 10.4621(3)   | 73.865(2)    | 89.870(2)   | 77.560(3)    | 749.52(4)                  |
| 2           | 120          | 8.1871(2)    | 9.3487(3)    | 10.4625(3)   | 73.863(2)    | 89.874(2)   | 77.554(3)    | 749.74(4)                  |
| 3           | 140          | 8.1882(2)    | 9.3496(3)    | 10.4632(3)   | 73.860(2)    | 89.877(2)   | 77.556(3)    | 749.96(4)                  |
| 4           | 160          | 8.1893(2)    | 9.3504(3)    | 10.4643(3)   | 73.865(2)    | 89.879(2)   | 77.557(3)    | 750.21(4)                  |
| 5           | 180          | 8.1908(2)    | 9.3523(3)    | 10.4651(3)   | 73.862(2)    | 89.881(2)   | 77.553(3)    | 750.53(4)                  |
| 6           | 200          | 8.1919(2)    | 9.3529(3)    | 10.4664(3)   | 73.866(2)    | 89.882(2)   | 77.552(3)    | 750.80(4)                  |
| 7           | 220          | 8.1935(2)    | 9.3543(3)    | 10.4681(3)   | 73.862(2)    | 89.882(2)   | 77.551(3)    | 751.16(4)                  |
| 8           | 240          | 8.1949(2)    | 9.3558(3)    | 10.4691(3)   | 73.861(2)    | 89.884(2)   | 77.552(3)    | 751.47(4)                  |
| 9           | 260          | 8.1965(2)    | 9.3569(3)    | 10.4707(3)   | 73.864(2)    | 89.886(2)   | 77.549(3)    | 751.82(4)                  |
| 10          | 280          | 8.1981(2)    | 9.3591(3)    | 10.4718(3)   | 73.860(2)    | 89.887(2)   | 77.546(3)    | 752.20(4)                  |
| 11          | 300          | 8.1998(2)    | 9.3608(3)    | 10.4728(3)   | 73.863(2)    | 89.892(2)   | 77.545(3)    | 752.57(4)                  |
| 12          | 302          | 8.2009(3)    | 9.3608(3)    | 10.4744(3)   | 73.866(3)    | 89.893(3)   | 77.503(3)    | 752.66(4)                  |
| 13          | 322          | 8.2022(3)    | 9.3625(3)    | 10.4755(3)   | 73.865(3)    | 89.893(3)   | 77.505(3)    | 753.00(4)                  |
| 14          | 373          | 8.2072(3)    | 9.3668(3)    | 10.4801(3)   | 73.865(3)    | 89.895(3)   | 77.501(3)    | 754.12(4)                  |
| 15          | 423          | 8.2118(3)    | 9.3717(3)    | 10.4844(3)   | 73.869(3)    | 89.904(3)   | 77.505(3)    | 755.27(4)                  |
| 16          | 473          | 8.2171(3)    | 9.3774(3)    | 10.4887(3)   | 73.862(3)    | 89.910(3)   | 77.506(3)    | 756.49(4)                  |
| 17          | 522          | 8.2223(3)    | 9.3821(3)    | 10.4938(3)   | 73.866(3)    | 89.916(3)   | 77.507(3)    | 757.73(4)                  |
| 18          | 573          | 8.2274(3)    | 9.3879(4)    | 10.4987(3)   | 73.860(3)    | 89.924(3)   | 77.506(3)    | 759.00(5)                  |
| 19          | 623          | 8.2326(3)    | 9.3934(4)    | 10.5033(4)   | 73.868(3)    | 89.930(3)   | 77.498(3)    | 760.26(5)                  |
| 20          | 673          | 8.2381(3)    | 9.3987(4)    | 10.5084(4)   | 73.868(3)    | 89.940(3)   | 77.503(3)    | 761.57(5)                  |
| 21          | 724          | 8.2434(4)    | 9.4043(4)    | 10.5141(4)   | 73.860(3)    | 89.947(3)   | 77.497(4)    | 762.87(5)                  |
| 22          | 766          | 8.2468(4)    | 9.4107(4)    | 10.5187(4)   | 73.870(3)    | 89.942(3)   | 77.504(4)    | 764.10(5)                  |

25

26

27

28

29
